# Supplementary material
Source: publisher figshare collection journal article supplement (https://acs.figshare.com/ndownloader/files/4473043)
Supplement: Supplementary file 1 [file 4473043]

Effect of Solvent on the Crystal Growth of One-Dimensional  
ZrO<sub>2</sub>-TiO<sub>2</sub> Nanostructures

Rahima A. Lucky<sup>1</sup>, Ruohong Sui,<sup>2</sup> John M. H. Lo,<sup>2</sup> and Paul A. Charpentier\*<sup>1</sup>

<sup>1</sup>Department of Chemical and Biochemical Engineering,  
University of Western Ontario, London, ON, Canada, N6A 5B9

<sup>2</sup>Presently at Department of Chemistry, the University of Calgary  
2500 University Drive, NW, Calgary, AB, Canada, T1N 1N4

**Table SI-1: Composition and weight loss at different stages of thermal analysis.**

| Solvent         | Stage 1              |        | Stage 2              |        | Stage 3              |        | Total<br>wt%<br>loss |
|-----------------|----------------------|--------|----------------------|--------|----------------------|--------|----------------------|
|                 | T <sub>p1</sub> (°C) | Wt.(%) | T <sub>p2</sub> (°C) | Wt.(%) | T <sub>p3</sub> (°C) | Wt.(%) |                      |
| CO <sub>2</sub> | 40                   | 6.02   | 200                  | 20.68  | 343                  | 18.97  | 45.72                |
| Hexane          | 75                   | 6.31   | 198                  | 19.29  | 333                  | 22.02  | 47.92                |
| Xylenes         | 86                   | 5.61   | 191                  | 38.04  | 425                  | 13.54  | 59.01                |
| Isopropanol     | 95                   | 4.55   | 236                  | 42.95  | 319                  | 8.88   | 57.59                |
| Ethanol         | 53                   | 10.07  | 196                  | 14.11  | 336                  | 22.5   | 49.34                |

Note-a- composition of as prepared nanomaterials.

**Table SI-2. The thermodynamic properties and the average solubility parameters of the alkoxides.**

| <b>Molecule</b>                    | $\Delta H_f^{0*}$<br>(liquid)<br>Kcal/mol | $\Delta H_f^{0*}$ (gas)<br>Kcal/mol | $\Delta H_v^{0*}$<br>Kcal/mol | $V^0$ (liquid)<br>cm <sup>3</sup> /mol | $\delta$<br>(cal/cm <sup>3</sup> ) <sup>1/2</sup> |
|------------------------------------|-------------------------------------------|-------------------------------------|-------------------------------|----------------------------------------|---------------------------------------------------|
| Ti(OPr <sup>i</sup> ) <sub>4</sub> | -377**                                    | -360**                              | 17                            | 296***                                 | 7.44                                              |
| Zr(OPr <sup>i</sup> ) <sub>4</sub> | -                                         | -                                   | 31.5**                        | 310***                                 | 9.99                                              |

Note: \*  $\Delta H_f^0$ ,  $\Delta H_v^0$  and  $V^0$  denote the standard formation enthalpy, the enthalpy change of vaporization and the molar volume of the liquid, respectively.

\*\* Ref. <sup>26</sup>

\*\*\* The molar volume was calculated from the density at 293 K. The liquid volume change was neglected for temperature changes from 293 to 298 K.

**Table SI-3. The related atomic and group contributions to the energy of vaporization and mole volume at 25 °C.<sup>33</sup>**

| Atom or group                | $\Delta e_i$ (cal/mol) | $\Delta v_i$ (cm <sup>3</sup> /mol) |
|------------------------------|------------------------|-------------------------------------|
| CH <sub>3</sub>              | 1125                   | 33.5                                |
| CH                           | 820                    | -1.0                                |
| COO                          | 4300                   | 18.0                                |
| O                            | 800                    | 3.8                                 |
| Zr (calculated by this work) | 15400                  | 30.8                                |
| Ti (calculated by this work) | 930                    | 16.8                                |

\*- The solubility parameters of CO<sub>2</sub> are calculated for the selected temperature and pressure conditions using the density according to Giddings *et al.* with the provided values given in Table 2,<sup>21</sup>

$$\delta_{SC} = 1.25\sqrt{P_c} \frac{\rho_{R_{sc}}}{\rho_{RL}} = 0.384\rho \quad (\text{SI-1})$$

where,  $P_c$  is the critical pressure in atmospheres,  $\rho_{R_{sc}}$  is the reduced density of CO<sub>2</sub>,  $\rho_{RL} = 2.66$  is the reduced density of liquid CO<sub>2</sub> at its normal boiling point, and  $\rho$  is the density of CO<sub>2</sub> in mol/L.

**Figure SI-P1: The structures of DFT-optimized pure anatase (top) and Zr-doped anatase (bottom). Labels: Blue = Ti, Green = Zr, red = O.**

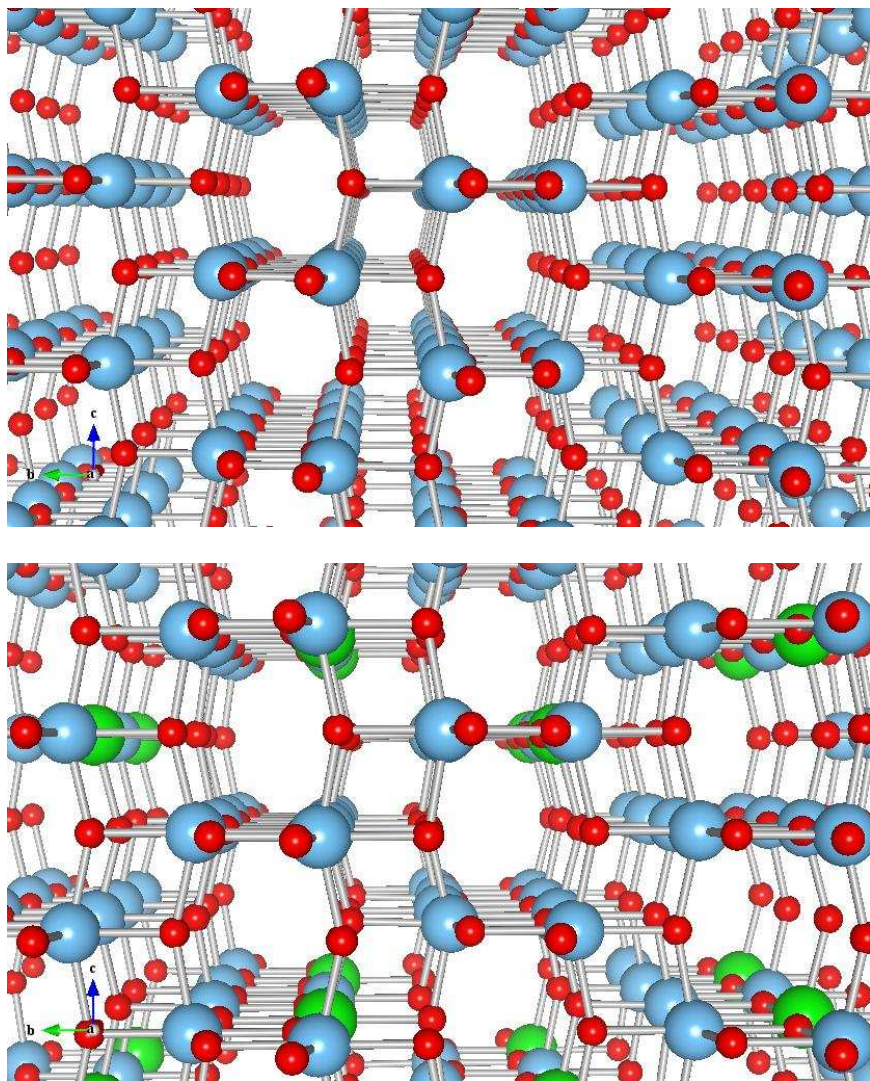

Lattice parameters (in conventional definition of lattice axes of anatase; different from those shown in the figures)

(1x2x1) TiO<sub>2</sub>: a = 3.80540 Å, b = 3.80549 Å, c = 9.47523 Å

(1x2x1) Zr-doped TiO<sub>2</sub>: a = 3.83552 Å, b = 3.83017 Å, c = 9.59331 Å

(2x2x1) TiO<sub>2</sub>: a = 3.80540 Å, b = 3.80549 Å, c = 9.47523 Å

(2x2x1) Zr-doped TiO<sub>2</sub>: a = 3.83618 Å, b = 3.83510 Å, c = 9.62817 Å

The Zr-doped anatase unit cell was generated by replacing one Ti atom by a Zr atom for every two unit cells of TiO<sub>2</sub>. This corresponds to the 12.5% of doping. In the (2x2x1) supercell, the two Zr atoms were placed such that the separation is farthest (the shortest Zr-Zr distance is 5.541 Å in the optimized (2x2x1) supercell of Zr-doped TiO<sub>2</sub>); this can eliminate the local, artificial distortion of the unit cell symmetry due to the Zr dopants.

### Details of the calculations of the (101) plane spacing of pure and Zr-doped anatase

The (101) plane spacing,  $d$ , can be deduced from the XRD spectrum using the Bragg's equation,  $d = (0.154 \text{ nm})/2 \sin \theta$ , where 0.154 nm is the wavelength of the X-ray source, and  $\theta$  is the diffraction angle. For pure  $\text{TiO}_2$  anatase,  $2\theta = 25.32^\circ$ , and thus  $d = 0.3513 \text{ nm}$ . In this work, we observed that  $2\theta = 25.17^\circ$  for Zr-doped anatase, and this corresponds to  $d = 0.3535 \text{ nm}$ . Hence, the percentage change in  $d$  is  $[(0.3535-0.3513)/0.3513] \times 100\% = 0.63\%$ .

By trigonometry, we can derive the (101) plane spacing of anatase (in Å) in terms of lattice constants:

$$d = |c| \sin \left( \tan^{-1} \left( \frac{|a|}{|c|} \right) \right) \quad (\text{SI-2})$$

Using the parameters given in figure SIP1, we can calculate the spacing for (1x2x1)  $\text{TiO}_2$ :

$$d = 9.47523 \sin \left( \tan^{-1} \left( \frac{3.80540}{9.47523} \right) \right) = 3.5313 \text{ \AA}$$

and for (1x2x1) Zr-doped  $\text{TiO}_2$ .

$$d = 0.95331 \sin \left( \tan^{-1} \left( \frac{3.83552}{9.59331} \right) \right) = 3.5571 \text{ \AA}$$

The resulting change in  $d$  is thus  $[(3.5571-3.5313)/3.5313] \times 100\% = 0.73\%$ . Similarly, we can calculate the  $d$  values for (2x2x1) pure anatase ( $d = 3.5313 \text{ \AA}$ ), Zr-doped anatase ( $d = 3.5628 \text{ \AA}$ ) and the corresponding deviation in  $d$  ( $\% \Delta d = 0.89\%$ ).
